# Supplementary material
Source: MDPI journal article supplement (https://www.mdpi.com/2077-0472/11/11/1107)
Supplement: s1 [file s1]

## SUPPLEMENTARY MATERIAL

### Information about the reclassification process

We wanted to identify and characterized (i) land cover changes linked to agricultural uses (crop production and extensive livestock grazing), (ii) land cover changes due to urban growth (artificial areas) and (iii) land cover changes due to agricultural abandonment and the concomitant forest and shrubland expansion (forest and seminatural areas). For doing so, we used CORINE Land Cover project (CLC). Particularly the first (1990) and last (2018) datasets available. Spanish CORINE changed the methodology in 2006 for mapping the territory [2,3]. As a result, there was an overestimation of some CLC categories before and after 2006, particularly the following categories: transitional woodlands-shrub and sclerophyllous vegetation, at the expense of natural grasslands and forests [2,4,5]. This meant that comparisons between CLC1990 and CLC2018 should not be conducted straightforward, as this could lead to misleading outcomes.

Based on CLC Level 1 and 3 classes (Table 1) [1], we defined four new categories that allow us to distinguish between (i) urban areas, (ii) crops, (iii) pastures, pasture-shrubland areas and agroforestry systems (extensive livestock grazing) and (iv) forest and shrubland areas (without livestock use). The description of this new categories is as follows:

- **Artificial surfaces.** Areas mainly use for dwellings, leisure urban parks, institutional buildings, industrial, commercial and transport networks, but also mines, dump areas or construction sites.
- **Crop production areas.** Areas used for cropping, which in our study areas are mainly rain-fed cereals and small orchards.
- **Livestock grazing areas.** Areas mainly covered by herbaceous vegetation and sparse shrubs in some cases, and agroforestry systems with clear signs of livestock grazing, such as water points, paths, stone walls, etc.
- **Forest and shrubland areas.** Areas covered with (semi-)natural woody vegetation such as forests (pine and different species of oak) and shrublands without signs of livestock presence and/or livestock grazing.

Once we had the CLC datasets (1990-2018) clipped in both sets of plots, the reclassification process entailed the assignment one of the new categories to each of the polygons included in the study plots. To do this, we first reviewed each polygon using high resolution aerial photos (Photogrammetric flight 1991 - Total Community, 1:18,000, Consejería de Política Territorial; 2020 - Total Community PNOA RGB, 25 x 25 cm, Plan Nacional de Ortofotografía Aérea (PNOA) 2020). We then assigned to each polygon one of new categories. This reclassification was verified with field visits to the study areas and checked with expert knowledge in the territory. We then calculated the area (in hectares) of each of the new categories (urban, crop production, livestock grazing and forest-shrubland) in each period (1990 and 2018), area (SR and CV) and buffer type (around village center and away from village center).

Finally, we calculated the percentage of the area of each plot represented by the CORINE level 3 class (Table 1) with the new categories (Tables 2-5). As a result of the reclassification process, we realized that e.g., pasture for livestock grazing and forest-shrubland were originally classified as sclerophyll vegetation (323 in CORINE

nomenclature), especially in areas away from village centers in SR (Tables 2-3). Moreover, forests and shrubland in our study areas mostly come from forest (31 in CORINE nomenclature) and sclerophyll vegetation (323) categories, while pastures for livestock grazing, come mostly from natural grasslands (321).

**Table S1.** The standard CORINE Land Cover nomenclature (class names only) for the 3 level 1 classes identified in our study.

| Level 1                         | Level 2                                           | Level 3                                                                                       |
|---------------------------------|---------------------------------------------------|-----------------------------------------------------------------------------------------------|
| 1. Artificial surfaces          | 1.1. Urban fabric                                 | 1.1.1. Continuous urban fabric                                                                |
|                                 |                                                   | 1.1.2. Discontinuous urban fabric                                                             |
|                                 | 1.2. Industrial, commercial and transport units   | 1.2.1. Industrial or commercial units                                                         |
|                                 |                                                   | 1.2.2. Road and rail networks and associated land                                             |
|                                 |                                                   | 1.2.3. Port areas                                                                             |
|                                 |                                                   | 1.2.4. Airports                                                                               |
|                                 | 1.3. Mine, dump and construction sites            | 1.3.1. Mineral extraction sites                                                               |
|                                 |                                                   | 1.3.2. Dump sites                                                                             |
|                                 |                                                   | 1.3.3. Construction sites                                                                     |
| 2. Agricultural areas           | 1.4. Artificial, non-agricultural vegetated areas | 1.4.1. Green urban areas                                                                      |
|                                 |                                                   | 1.4.2. Sport and leisure facilities                                                           |
|                                 | 2.1. Arable land                                  | 2.1.1. Non-irrigated arable land                                                              |
|                                 |                                                   | 2.1.2. Permanently irrigated land                                                             |
|                                 |                                                   | 2.1.3. Rice fields                                                                            |
|                                 | 2.2. Permanent crops                              | 2.2.1. Vineyards                                                                              |
|                                 |                                                   | 2.2.2. Fruit trees and berry plantations                                                      |
|                                 |                                                   | 2.2.3. Olive groves                                                                           |
|                                 | 2.3. Pastures                                     | 2.3.1. Pastures                                                                               |
|                                 | 2.4. Heterogeneous agricultural areas             | 2.4.1. Annual crops associated with permanent crops                                           |
|                                 |                                                   | 2.4.2. Complex cultivation patterns                                                           |
|                                 |                                                   | 2.4.3. Land principally occupied by agriculture, with significant areas of natural vegetation |
|                                 |                                                   | 2.4.4. Agroforestry areas                                                                     |
| 3. Forest and seminatural areas | 3.1. Forests                                      | 3.1.1. Broad-leaved forest                                                                    |
|                                 |                                                   | 3.1.2. Coniferous forest                                                                      |
|                                 |                                                   | 3.1.3. Mixed forest                                                                           |
|                                 | 3.2. Shrub and/or herbaceous associations         | 3.2.1. Natural grassland                                                                      |
|                                 |                                                   | 3.2.2. Moors and heathland                                                                    |
|                                 |                                                   | 3.2.3. Sclerophyllous vegetation                                                              |
|                                 |                                                   | 3.2.4. Transitional woodland-scrub                                                            |
|                                 | 3.3. Open spaces with little or no vegetation     | 3.3.1. Beaches, dunes, sands                                                                  |
|                                 |                                                   | 3.3.2. Bare rocks                                                                             |
|                                 |                                                   | 3.3.3. Sparsely vegetated areas                                                               |
|                                 |                                                   | 3.3.4. Burnt areas                                                                            |
|                                 |                                                   | 3.3.5. Glaciers and perpetual snow                                                            |

**Table S2.** Description of the original CLC classes that make up the new categories for SR in 1990. We show the area (ha) of each original CLC classes and the % of total area for each of the new categories and type of plot.

| SR 1990                  |                      |                      |           |                 |
|--------------------------|----------------------|----------------------|-----------|-----------------|
| Type of plot             | New Categories       | Original CLC classes | Area (ha) | % of total area |
| Around village center    | Forest and shrubland | 311                  | 33.3      | 2.4             |
|                          |                      | 312                  | 478.9     | 34.8            |
|                          |                      | 321                  | 37.7      | 2.7             |
|                          |                      | 323                  | 589.0     | 42.7            |
|                          |                      | 324                  | 167.3     | 12.1            |
|                          |                      | 332                  | 71.8      | 5.2             |
|                          | Livestock grazing    | 311                  | 144.7     | 10.0            |
|                          |                      | 321                  | 214.8     | 14.8            |
|                          |                      | 323                  | 924.8     | 63.6            |
|                          |                      | 324                  | 169.5     | 11.7            |
| Away from village center | Crop production      | 242                  | 451.4     | 100.0           |
|                          | Forest and shrubland | 311                  | 128.9     | 42.6            |
|                          |                      | 312                  | 32.8      | 10.8            |
|                          |                      | 321                  | 36.1      | 11.9            |
|                          |                      | 324                  | 104.6     | 34.6            |
|                          | Livestock grazing    | 231                  | 242.1     | 12.3            |
|                          |                      | 242                  | 63.9      | 3.2             |
|                          |                      | 243                  | 95.1      | 4.8             |
|                          |                      | 311                  | 68.2      | 3.5             |
|                          |                      | 321                  | 490.5     | 24.9            |
|                          |                      | 323                  | 765.9     | 38.9            |
|                          |                      | 324                  | 241.8     | 12.3            |

**Table S3.** Description of the original CLC classes that make up the new categories for SR in 2018. We show the area (ha) of each original CLC classes and the % of total area for each of the new categories and type of plot.

| SR 2018                  |                      |                      |           |                 |
|--------------------------|----------------------|----------------------|-----------|-----------------|
| Type of plot             | New Categories       | Original CLC classes | Area (ha) | % of total area |
| Away from village center | Forest and shrubland | 311                  | 387.6     | 18.3            |
|                          |                      | 312                  | 214.9     | 10.1            |
|                          |                      | 321                  | 154.2     | 7.3             |
|                          |                      | 322                  | 326.9     | 15.4            |
|                          |                      | 323                  | 649.3     | 30.6            |
|                          |                      | 324                  | 165.5     | 7.8             |
|                          |                      | 332                  | 28.0      | 1.3             |
|                          |                      | 333                  | 194.2     | 9.2             |
|                          | Livestock grazing    | 311                  | 36.0      | 5.9             |
|                          |                      | 321                  | 557.7     | 91.5            |
|                          |                      | 324                  | 16.1      | 2.6             |
| Around village center    | Crop production      | 231                  | 110.6     | 29.4            |
|                          |                      | 242                  | 265.1     | 70.6            |
|                          | Forest and shrubland | 311                  | 887.7     | 73.9            |
|                          |                      | 321                  | 7.6       | 0.6             |
|                          |                      | 322                  | 273.4     | 22.7            |
|                          |                      | 323                  | 22.2      | 1.8             |
|                          |                      | 324                  | 10.9      | 0.9             |
|                          |                      | 333                  | 0.1       | 0.0             |
|                          | Livestock grazing    | 211                  | 0.9       | 0.1             |
|                          |                      | 231                  | 15.8      | 1.3             |
|                          |                      | 243                  | 117.5     | 10.0            |
|                          |                      | 313                  | 36.8      | 3.1             |
|                          |                      | 321                  | 794.9     | 67.8            |
|                          |                      | 323                  | 120.5     | 10.3            |
|                          |                      | 324                  | 86.2      | 7.4             |

**Table S4.** Description of the original CLC classes that make up the new categories for CV in 1990. We show the area (ha) of each original CLC classes and the % of total area for each of the new categories and type of plot.

| CV 1990                  |                      |                      |           |                 |
|--------------------------|----------------------|----------------------|-----------|-----------------|
| Type of plot             | New Categories       | Original CLC classes | Area (ha) | % of total area |
| Away from village center | Crop production      | 211                  | 36.0      | 100.0           |
|                          | Forest and shrubland | 311                  | 3.7       | 0.5             |
|                          |                      | 323                  | 77.1      | 10.5            |
|                          |                      | 324                  | 655.1     | 89.0            |
|                          | Livestock grazing    | 321                  | 1815.5    | 88.1            |
|                          |                      | 323                  | 179.7     | 8.7             |
|                          |                      | 324                  | 65.2      | 3.2             |
| Around village center    | Crop production      | 211                  | 2.1       | 29.2            |
|                          |                      | 244                  | 5.1       | 70.8            |
|                          | Forest and shrubland | 311                  | 793.1     | 98.6            |
|                          |                      | 313                  | 3.7       | 0.5             |
|                          |                      | 324                  | 7.9       | 1.0             |
|                          | Livestock grazing    | 211                  | 6.7       | 0.2             |
|                          |                      | 321                  | 3856.1    | 99.8            |
|                          | Artificial surfaces  | 111                  | 124.7     | 13.1            |
|                          |                      | 112                  | 591.8     | 62.1            |
|                          |                      | 121                  | 67.9      | 7.1             |
|                          |                      | 131                  | 34.6      | 3.6             |
|                          |                      | 133                  | 133.4     | 14.0            |

**Table S5.** Description of the original CLC classes that make up the new categories for CV in 2018. We show the area (ha) of each original CLC classes and the % of total area for each of the new categories and type of plot.

| CV 2018                  |                      |                      |           |                 |
|--------------------------|----------------------|----------------------|-----------|-----------------|
| Type of plot             | New Categories       | Original CLC classes | Area (ha) | % of total area |
| Away from village center | Forest and shrubland | 311                  | 297.1     | 36.6            |
|                          |                      | 312                  | 1.2       | 0.1             |
|                          |                      | 313                  | 446.8     | 55.1            |
|                          |                      | 323                  | 18.0      | 2.2             |
|                          |                      | 324                  | 47.7      | 5.9             |
|                          | Livestock grazing    | 211                  | 74.2      | 3.7             |
|                          |                      | 231                  | 48.9      | 2.4             |
|                          |                      | 244                  | 164.6     | 8.1             |
|                          |                      | 311                  | 135.4     | 6.7             |
|                          |                      | 313                  | 65.5      | 3.2             |
|                          |                      | 321                  | 1452.8    | 71.9            |
|                          |                      | 324                  | 80.1      | 4.0             |
|                          | Crop production      | 211                  | 50.4      | 100.0           |
|                          | Forest and shrubland | 244                  | 46.6      | 4.7             |
|                          |                      | 311                  | 788.8     | 80.1            |
|                          |                      | 313                  | 56.3      | 5.7             |
|                          |                      | 323                  | 26.5      | 2.7             |
|                          |                      | 324                  | 66.5      | 6.8             |
| Around village center    | Livestock grazing    | 231                  | 331.1     | 13.2            |
|                          |                      | 233                  | 1.1       | 0.0             |
|                          |                      | 321                  | 2040.1    | 81.1            |
|                          |                      | 323                  | 93.6      | 3.7             |
|                          |                      | 324                  | 50.2      | 2.0             |
|                          | Artificial surfaces  | 111                  | 128.3     | 6.1             |
|                          |                      | 112                  | 908.4     | 43.0            |
|                          |                      | 121                  | 562.1     | 26.6            |
|                          |                      | 122                  | 47.8      | 2.3             |
|                          |                      | 131                  | 45.5      | 2.2             |
|                          |                      | 133                  | 203.3     | 9.6             |
|                          |                      | 141                  | 76.7      | 3.6             |
|                          |                      | 142                  | 5.0       | 0.2             |
|                          |                      | 231*                 | 60.4      | 2.9             |
|                          |                      | 321*                 | 75.7      | 3.6             |

## References

1. Büttner, G.; Kosztra, B.; Maucha, G.; Pataki, R.; Kleeschulte, S.; Hazeu, C.; Vittek, M.; Schröder, C.; Littkopf, A. Copernicus Land Monitoring Service - Corine Land Cover User Manual. *Eur. Environ. Agency* 2021, 1.
2. García-Álvarez, D.; Camacho Olmedo, M.T. Changes in the methodology used in the production of the Spanish CORINE: Uncertainty analysis of the new maps. *Int. J. Appl. Earth Obs. Geoinf.* **2017**, *63*, 55–67, doi:10.1016/j.jag.2017.07.001.
3. Hazeu, G.; Büttner, G.; Arozarena, A.; Valcárcel, N.; Feranec, J.; Smith, G. CORINE Land Cover 1990–2000 Changes: Analysis and Assessment. *Eur. Landsc. Dyn.* **2016**, 129–134, doi:10.1201/9781315372860-27.
4. Martínez-Fernández, J.; Ruiz-Benito, P.; Bonet, A.; Gómez, C. Methodological variations in the production of CORINE land cover and consequences for long-term land cover change studies. The case of Spain. *Int. J. Remote Sens.* **2019**, *40*, 8914–8932, doi:10.1080/01431161.2019.1624864.
5. Martínez-Fernández, J.; Ruiz-Benito, P.; Bonet Jornet, A. La última actualización de la cartografía CORINE Land Cover (CLC2012) en España: repercusiones para los estudios de cambios en la cobertura y uso del suelo. *Estud. Geográficos* **2018**, *79*, 267–281, doi:10.1201/9781315372860-27.

**Table S6.** Land uses and covers at village-level based on Corine Land Cover Project (CLC 1990 and 2018), distinguishing between areas ‘around village center’ and ‘away from village’. CV: Colmenar Viejo and Tres Cantos municipalities; SR: municipalities from Sierra del Rincón. Since municipalities in SR are very small, not all municipalities (9) have data in plots “away from village center”.

| Regional | Municipality                  | Intra-regional           | Category                 | Area<br>(ha)<br>1990 | Area<br>(ha)<br>2018 |
|----------|-------------------------------|--------------------------|--------------------------|----------------------|----------------------|
| CV       | Colmenar Viejo                | Around village center    | Forest-shrubland         | 11,6                 | 6,2                  |
|          |                               |                          | Livestock grazing        | 2292,6               | 1845,1               |
|          |                               |                          | Crop production          | 0,1                  | 0,0                  |
|          |                               |                          | Artificial cover (Urban) | 538,5                | 991,6                |
|          |                               | Away from village center | Forest-shrubland         | 660,1                | 771,8                |
|          |                               |                          | Livestock grazing        | 1689,0               | 1613,1               |
|          |                               |                          | Crop production          | 35,8                 | 0,0                  |
|          | Tres Cantos                   | Around village center    | Livestock grazing        | 1500,6               | 670,0                |
|          |                               |                          | Artificial cover (Urban) | 412,3                | 1108,4               |
|          |                               |                          | Forest-shrubland         | 250,3                | 344,5                |
|          |                               |                          | Crop production          | 2,0                  | 42,3                 |
|          |                               | Away from village center | Livestock grazing        | 291,4                | 270,0                |
|          |                               |                          | Crop production          | 0,2                  | 0,0                  |
|          |                               |                          | Forest-shrubland         | 0,0                  | 21,6                 |
| SR       | Horcajo de la Sierra - Aoslos | Around village center    | Livestock grazing        | 266,6                | 205,8                |
|          |                               |                          | Crop production          | 108,4                | 125,5                |
|          |                               |                          | Forest-shrubland         | 0,9                  | 44,6                 |
|          |                               | Away from village center | Livestock grazing        | 312,9                | 71,9                 |
|          |                               |                          | Forest-shrubland         | 0,0                  | 241,0                |
|          | Horcajuelo de la Sierra       | Around village center    | Livestock grazing        | 261,2                | 130,8                |
|          |                               |                          | Crop production          | 0,3                  | 0,3                  |
|          |                               |                          | Forest-shrubland         | 47,0                 | 177,4                |
|          |                               | Away from village center | Forest-shrubland         | 248,6                | 472,7                |
|          |                               |                          | Livestock grazing        | 280,0                | 55,9                 |
|          | La Hiruela                    | Around village center    | Forest-shrubland         | 139,7                | 233,1                |
|          |                               |                          | Livestock grazing        | 139,1                | 45,7                 |
|          | La Hiruela                    | Away from village center | Forest-shrubland         | 41,3                 | 102,3                |
|          |                               |                          | Livestock grazing        | 83,6                 | 22,6                 |
|          | Madarcos                      | Around village center    | Livestock grazing        | 120,0                | 131,0                |
|          |                               |                          | Crop production          | 112,0                | 74,7                 |
|          |                               |                          | Forest-shrubland         | 0,0                  | 26,2                 |
|          | Montejo de la Sierra          | Around village center    | Livestock grazing        | 185,3                | 151,1                |
|          |                               |                          | Crop production          | 118,6                | 69,7                 |
|          |                               |                          | Forest-shrubland         | 0,0                  | 83,2                 |
|          |                               | Away from village center | Livestock grazing        | 292,7                | 155,3                |
|          |                               |                          | Forest-shrubland         | 70,9                 | 208,3                |
|          | Prádena del Rincón            | Around village center    | Livestock grazing        | 107,8                | 64,5                 |
|          |                               |                          | Crop production          | 141,2                | 70,1                 |



|                     |                          |                   |       |       |
|---------------------|--------------------------|-------------------|-------|-------|
|                     |                          | Forest-shrubland  | 1,0   | 115,3 |
|                     | Away from village center | Livestock grazing | 484,5 | 304,0 |
|                     |                          | Forest-shrubland  | 12,1  | 192,6 |
| Puebla de la Sierra | Around village center    | Livestock grazing | 268,8 | 122,1 |
|                     |                          | Forest-shrubland  | 45,8  | 192,6 |
|                     | Away from village center | Forest-shrubland  | 628,5 | 628,5 |
| Robregordo          | Around village center    | Forest-shrubland  | 7,0   | 164,1 |
|                     |                          | Livestock grazing | 303,7 | 111,3 |
|                     |                          | Crop production   | 0,0   | 35,4  |
| Somosierra          | Around village center    | Forest-shrubland  | 43,6  | 161,0 |
|                     |                          | Livestock grazing | 268,5 | 151,1 |
|                     | Away from village center | Forest-shrubland  | 359,5 | 359,5 |
